# Supplementary material for: Changes in ALBI Score and PIVKA-II within Three Months after Commencing Atezolizumab Plus Bevacizumab Treatment Affect Overall Survival in Patients with Unresectable Hepatocellular Carcinoma
Source: MDPI journal article supplement (doi:10.3390/cancers14246089), 2022-12-10
Supplement: s1 [file s1]

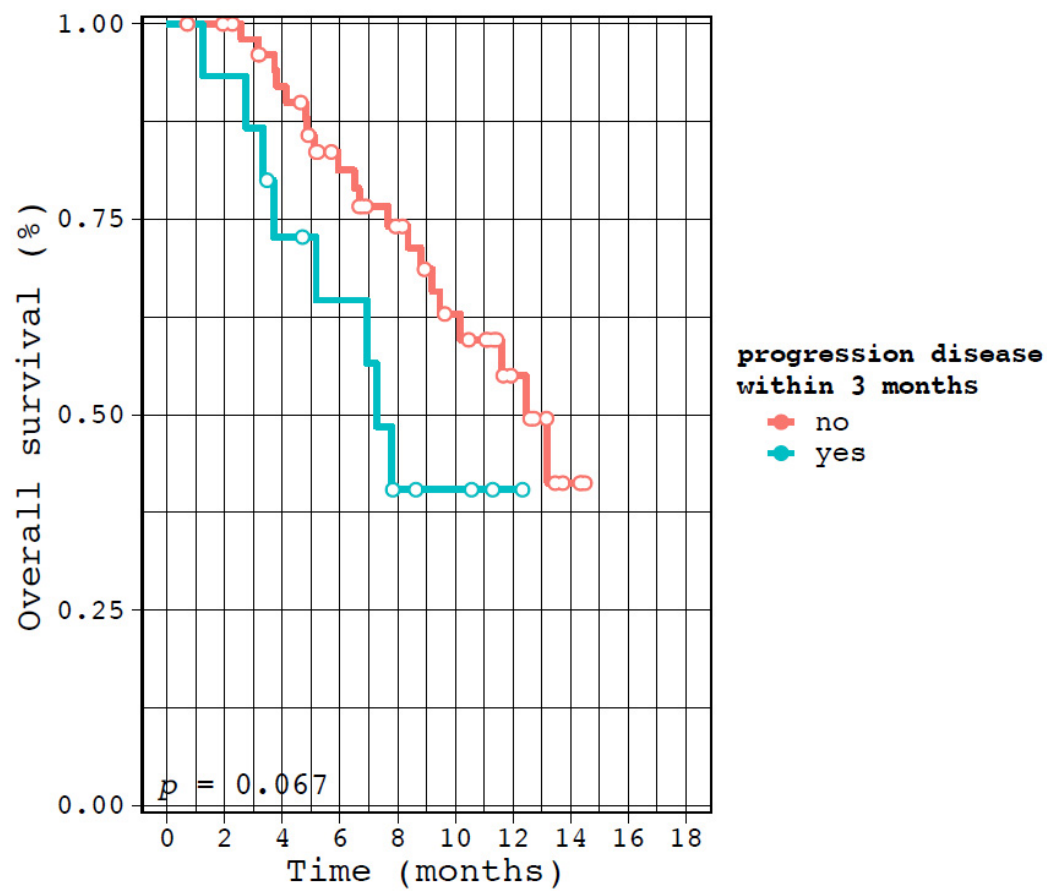

**Figure S1.** Kaplan–Meier curve for overall survival divided into two groups who had progression disease within three months and who did not.

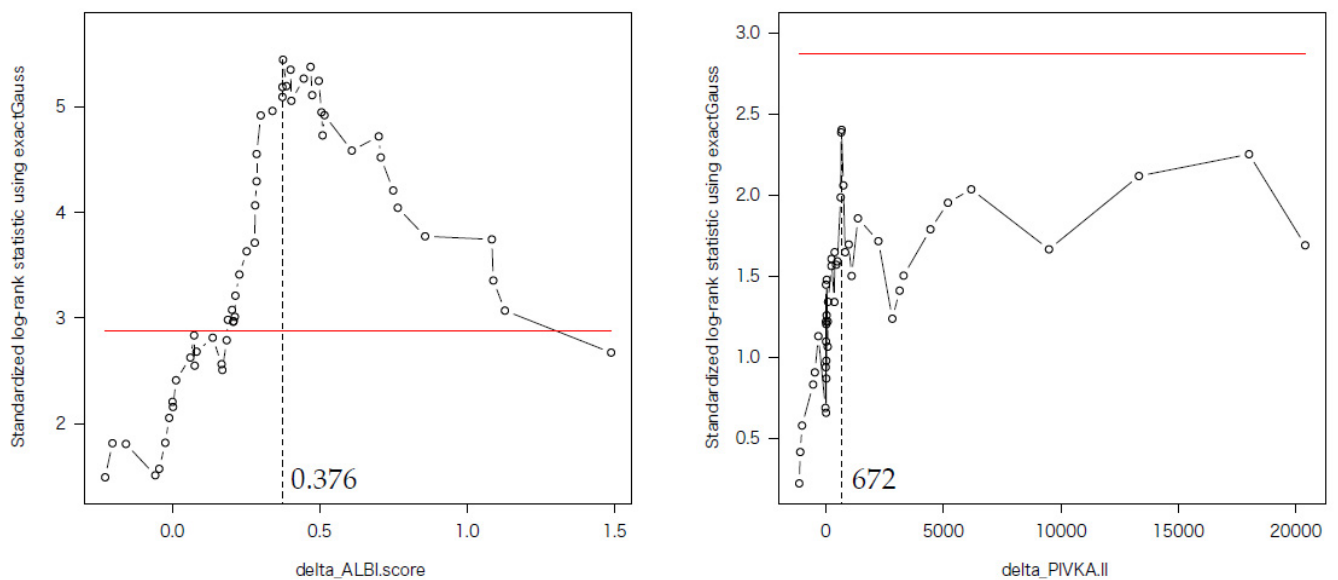

**Figure S2.** The result of the optimal cutoff values of the  $\Delta$  ALBI score and  $\Delta$  PIVKA-II according to the maximally selected rank statistics

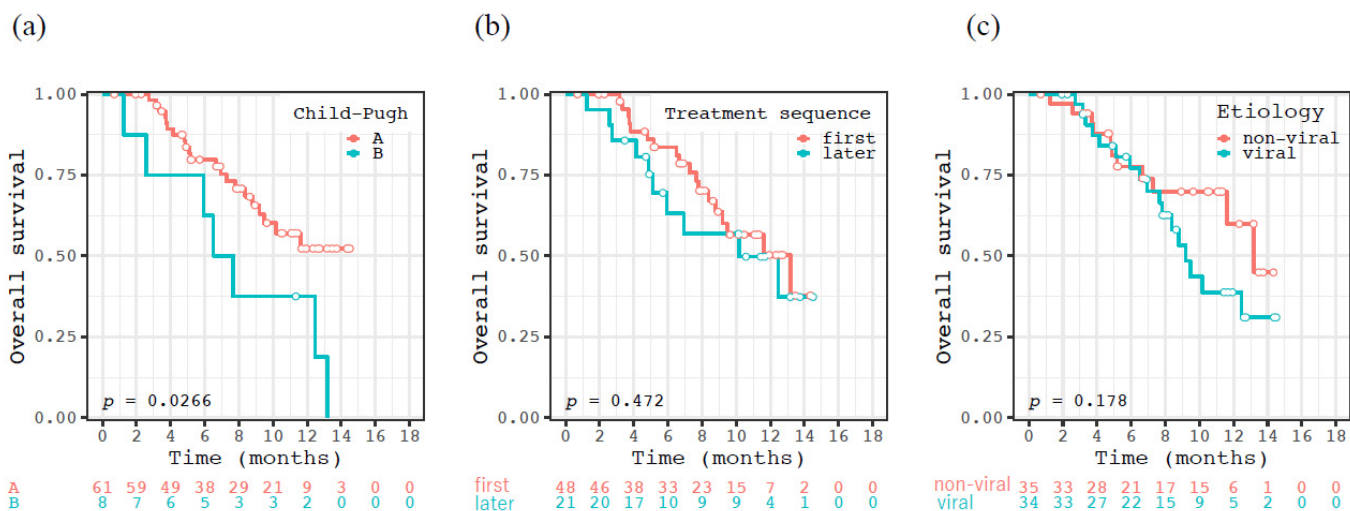

**Figure S3:** Kaplan–Meier curve for overall survival divided by Child–Pugh A and B (a), first-line and later-line (b), and viral hepatitis and non-viral hepatitis (c).

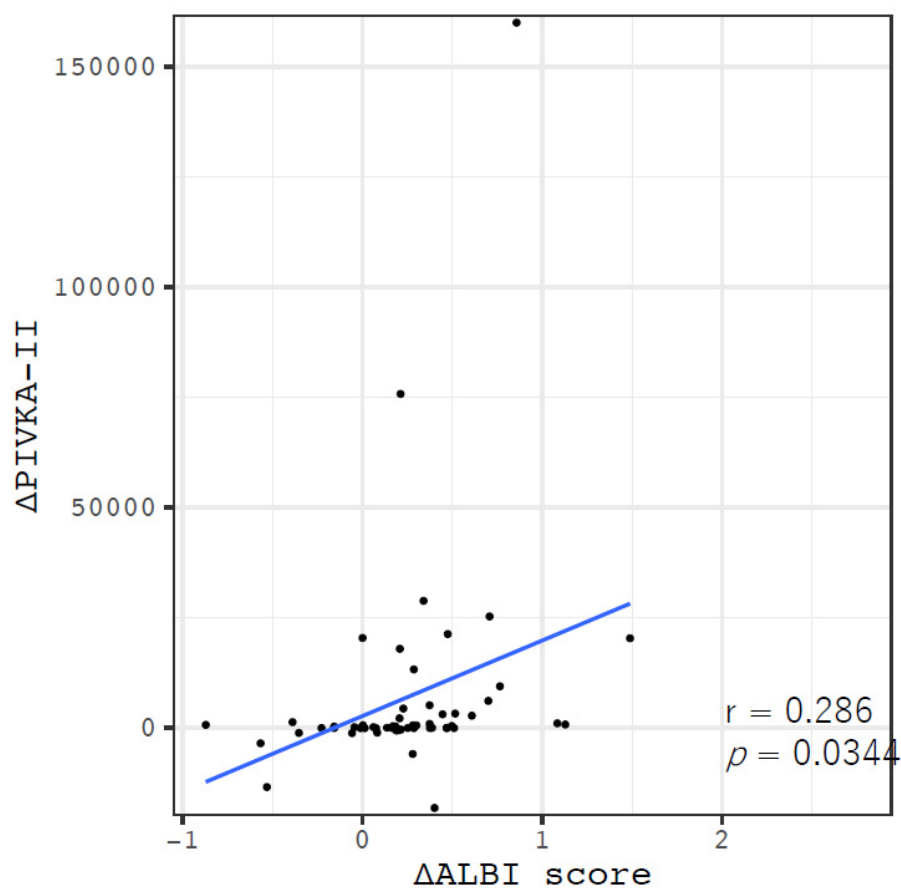

**Figure S4.** A correlation between the  $\Delta$  ALBI score and  $\Delta$  PIVKA-II.

**Table S1.** Univariate and multivariate analyses of possible risk factors for overall survival among the changes of clinical indicators within 3 months by Cox proportional hazards model using AFP and PIVKA-II change ratio instead of  $\Delta$  AFP and  $\Delta$  PIVKA-II

| Variables                           | univariate analysis |         | multivariate analysis |         |
|-------------------------------------|---------------------|---------|-----------------------|---------|
|                                     | HR (95%CI)          | P value | HR (95%CI)            | P value |
| $\Delta$ Child-Pugh score /3 months | 1.971 (1.420–2.737) | <0.001  |                       |         |
| $\Delta$ ALBI score /3 months       | 2.951 (1.956–4.453) | < 0.001 | 5.785 (1.822–18.37)   | 0.003   |
| $\Delta$ Albumin (g/dL) /3 months   | 0.167 (0.069–0.409) | < 0.001 |                       |         |
| $\Delta$ AST (U/L) /3 months        | 1.001 (0.991–1.011) | 0.846   |                       |         |
| $\Delta$ ALT (U/L) /3 months        | 0.999 (0.985–1.014) | 0.925   |                       |         |
| $\Delta$ T-Bil (mg/dL) /3 months    | 1.276 (1.092–1.490) | 0.002   |                       |         |
| $\Delta$ PT (%) /3 months)          | 0.985 (0.966–1.004) | 0.120   |                       |         |
| AFP change ratio*                   | 1.025 (1.003–1.047) | 0.023   | 1.023 (0.998–1.045)   | 0.110   |
| PIVKA-II change ratio*              | 1.015 (0.996–1.033) | 0.118   |                       |         |

\* defined by AFP and PIVKA-II values at 3 months after Atez/Bev treatment divided by their values before the treatment

**Table S2.** Univariate and multivariate analyses of possible risk factors for overall survival in 54 patients who did not have progression disease at 3 months

| Variables                            | univariate analysis |         | multivariate analysis |         |
|--------------------------------------|---------------------|---------|-----------------------|---------|
|                                      | HR (95%CI)          | P value | HR (95%CI)            | P value |
| $\Delta$ Child-Pugh score /3 months  | 1.778 (1.236–2.557) | 0.002   |                       |         |
| $\Delta$ ALBI score /3 months        | 4.417 (2.171–8.985) | < 0.001 | 1.893 (0.422-8.491)   | 0.405   |
| $\Delta$ Albumin (g/dL) /3 months    | 0.281(0.095–0.827)  | 0.021   |                       |         |
| $\Delta$ AST (U/L) /3 months         | 1.030 (1.003–1.057) | 0.027   | 1.028 (0.997-1.060)   | 0.075   |
| $\Delta$ ALT (U/L) /3 months         | 1.037 (1.007–1.069) | 0.016   |                       |         |
| $\Delta$ T-Bil (mg/dL) /3 months     | 1.252 (1.072–1.461) | 0.004   |                       |         |
| $\Delta$ PT (%) /3 months)           | 0.982 (0.961–1.002) | 0.080   |                       |         |
| $\Delta$ AFP (ng/mL) /3 months       | 1.002 (0.999–1.004) | 0.152   |                       |         |
| $\Delta$ PIVKA-II (mAU/mL) /3 months | 1.002 (1.001–1.003) | 0.007   | 1.002 (1.000–1.003)   | 0.033   |
